# Supplementary material for: Early Hearing Detection and Intervention programmes for neonates, infants and children in non-Asian low-income and middle-income countries: a systematic review
Source: PubMed Central journal article supplement (PMC11552602; doi:10.1136/bmjpo-2024-002794), 2024-11-05
Supplement: bmjpo-8-1-s001.pdf [file bmjpo-8-1-s001.pdf]

## SUPPLEMENTARY MATERIAL FIGURE 1

- a. Results of RoB assessment of the studies describing the neonatal hearing screening programs

|     | Q1 – Was there a clear question for the study to address? | Q5 – Is the disease status of the tested population clearly described? | Q6 – Were the methods for performing the test described in sufficient detail? | Q9 – Can the results be applied to your patients/the population of interest? | Q10 – Can the test be applied to your patient or population of interest? | Q11 – Were all outcomes important to the individual or population considered? | Overall |
|-----|-----------------------------------------------------------|------------------------------------------------------------------------|-------------------------------------------------------------------------------|------------------------------------------------------------------------------|--------------------------------------------------------------------------|-------------------------------------------------------------------------------|---------|
| A1  | Low                                                       | Low                                                                    | Low                                                                           | Low                                                                          | Low                                                                      | Low                                                                           | Low     |
| A2  | Low                                                       | Low                                                                    | Low                                                                           | Low                                                                          | Low                                                                      | Low                                                                           | Low     |
| A3  | Low                                                       | Low                                                                    | Unclear                                                                       | Low                                                                          | Low                                                                      | Low                                                                           | Low     |
| A4  | Low                                                       | Low                                                                    | Low                                                                           | Low                                                                          | Low                                                                      | Low                                                                           | Low     |
| A5  | Low                                                       | Low                                                                    | Low                                                                           | Low                                                                          | Low                                                                      | Low                                                                           | Low     |
| A6  | Low                                                       | Low                                                                    | Low                                                                           | Low                                                                          | Low                                                                      | Low                                                                           | Low     |
| A7  | Low                                                       | Low                                                                    | Unclear                                                                       | Low                                                                          | Low                                                                      | Low                                                                           | Low     |
| A8  | Low                                                       | Low                                                                    | Low                                                                           | Low                                                                          | Low                                                                      | Low                                                                           | Low     |
| A9  | Low                                                       | Unclear                                                                | Low                                                                           | Low                                                                          | Low                                                                      | Low                                                                           | Low     |
| A10 | Low                                                       | Low                                                                    | Low                                                                           | Low                                                                          | Low                                                                      | Low                                                                           | Low     |
| A11 | Low                                                       | Low                                                                    | Low                                                                           | Low                                                                          | Low                                                                      | Low                                                                           | Low     |
| A12 | Low                                                       | Low                                                                    | Unclear                                                                       | Low                                                                          | Low                                                                      | Low                                                                           | Low     |
| A13 | Low                                                       | Low                                                                    | Low                                                                           | Low                                                                          | Low                                                                      | Low                                                                           | Low     |
| A14 | Low                                                       | Low                                                                    | Low                                                                           | Low                                                                          | Low                                                                      | Low                                                                           | Low     |
| A15 | Low                                                       | Low                                                                    | Low                                                                           | Low                                                                          | Low                                                                      | Low                                                                           | Low     |
| A16 | Low                                                       | Low                                                                    | Low                                                                           | Low                                                                          | Low                                                                      | Low                                                                           | Low     |
| A17 | Low                                                       | Low                                                                    | Low                                                                           | Low                                                                          | Low                                                                      | Low                                                                           | Low     |
| A18 | Low                                                       | Unclear                                                                | Low                                                                           | Low                                                                          | Low                                                                      | Low                                                                           | Low     |
| A19 | Low                                                       | Unclear                                                                | Low                                                                           | Low                                                                          | Low                                                                      | Low                                                                           | Low     |
| A20 | Low                                                       | Unclear                                                                | Unclear                                                                       | Low                                                                          | Low                                                                      | Low                                                                           | Low     |
| A21 | Low                                                       | Low                                                                    | Low                                                                           | Low                                                                          | Low                                                                      | Low                                                                           | Low     |
| A22 | Low                                                       | Low                                                                    | Low                                                                           | Low                                                                          | Low                                                                      | Low                                                                           | Low     |
| A23 | Low                                                       | Low                                                                    | Low                                                                           | Low                                                                          | Low                                                                      | Low                                                                           | Low     |
| A24 | Low                                                       | Low                                                                    | Low                                                                           | Low                                                                          | Low                                                                      | Low                                                                           | Low     |
| A25 | Low                                                       | Low                                                                    | Low                                                                           | Low                                                                          | Low                                                                      | Low                                                                           | Low     |
| A26 | Low                                                       | Low                                                                    | Low                                                                           | Low                                                                          | Low                                                                      | Low                                                                           | Low     |
| A27 | Low                                                       | Unclear                                                                | Low                                                                           | Low                                                                          | Low                                                                      | Low                                                                           | Low     |
| A28 | Low                                                       | Low                                                                    | Low                                                                           | Low                                                                          | Low                                                                      | Low                                                                           | Low     |
| A29 | Low                                                       | Unclear                                                                | Low                                                                           | Low                                                                          | Low                                                                      | Low                                                                           | Low     |

b. Results of RoB assessment of the studies describing the hearing screening programs for infants and older children

|     | <b>Q1 – Was there a clear question for the study to address?</b> | <b>Q5 – Is the disease status of the tested population clearly described?</b> | <b>Q6 – Were the methods for performing the test described in sufficient detail?</b> | <b>Q9 – Can the results be applied to your patients/the population of interest?</b> | <b>Q10 – Can the test be applied to your patient or population of interest?</b> | <b>Q11 – Were all outcomes important to the individual or population considered?</b> | <b>Overall</b> |
|-----|------------------------------------------------------------------|-------------------------------------------------------------------------------|--------------------------------------------------------------------------------------|-------------------------------------------------------------------------------------|---------------------------------------------------------------------------------|--------------------------------------------------------------------------------------|----------------|
| B1  | Low                                                              | Low                                                                           | Low                                                                                  | Low                                                                                 | Low                                                                             | Low                                                                                  | Low            |
| B2  | Low                                                              | Low                                                                           | Low                                                                                  | Low                                                                                 | Low                                                                             | Low                                                                                  | Low            |
| B3  | Low                                                              | Low                                                                           | Low                                                                                  | Low                                                                                 | Low                                                                             | Low                                                                                  | Low            |
| B4  | Low                                                              | Low                                                                           | Low                                                                                  | Low                                                                                 | Low                                                                             | Low                                                                                  | Low            |
| B5  | Low                                                              | Low                                                                           | Unclear                                                                              | Low                                                                                 | Low                                                                             | Low                                                                                  | Low            |
| B6  | Low                                                              | Low                                                                           | Low                                                                                  | Low                                                                                 | Low                                                                             | Low                                                                                  | Low            |
| B7  | Low                                                              | Low                                                                           | Low                                                                                  | Low                                                                                 | Low                                                                             | Low                                                                                  | Low            |
| B8  | Low                                                              | Low                                                                           | Low                                                                                  | Low                                                                                 | Low                                                                             | Low                                                                                  | Low            |
| B9  | Low                                                              | Low                                                                           | Low                                                                                  | Low                                                                                 | Low                                                                             | Low                                                                                  | Low            |
| B10 | Low                                                              | Low                                                                           | Low                                                                                  | Low                                                                                 | Low                                                                             | Low                                                                                  | Low            |
| B11 | Low                                                              | Low                                                                           | Low                                                                                  | Low                                                                                 | Low                                                                             | Low                                                                                  | Low            |
| B12 | Low                                                              | Low                                                                           | Low                                                                                  | Low                                                                                 | Low                                                                             | Low                                                                                  | Low            |
| B13 | Low                                                              | Low                                                                           | Low                                                                                  | Low                                                                                 | Low                                                                             | Low                                                                                  | Low            |
| B14 | Low                                                              | Low                                                                           | Low                                                                                  | Low                                                                                 | Low                                                                             | Low                                                                                  | Low            |
| B15 | Low                                                              | Low                                                                           | Low                                                                                  | Low                                                                                 | Low                                                                             | Low                                                                                  | Low            |
| B16 | Low                                                              | Unclear                                                                       | Low                                                                                  | Low                                                                                 | Low                                                                             | Low                                                                                  | Low            |
| B17 | Low                                                              | Low                                                                           | Low                                                                                  | Low                                                                                 | Low                                                                             | Low                                                                                  | Low            |
| B18 | Low                                                              | Unclear                                                                       | Low                                                                                  | Low                                                                                 | Low                                                                             | Low                                                                                  | Low            |
| B19 | Low                                                              | Low                                                                           | Low                                                                                  | Low                                                                                 | Low                                                                             | Low                                                                                  | Low            |
| B20 | Low                                                              | Low                                                                           | Low                                                                                  | Low                                                                                 | Low                                                                             | Low                                                                                  | Low            |
| B21 | Low                                                              | Low                                                                           | Low                                                                                  | Low                                                                                 | Low                                                                             | Low                                                                                  | Low            |
| B22 | Low                                                              | Low                                                                           | Unclear                                                                              | Low                                                                                 | Low                                                                             | Low                                                                                  | Low            |
| B23 | Low                                                              | Low                                                                           | Low                                                                                  | Low                                                                                 | Low                                                                             | Low                                                                                  | Low            |
| B24 | Low                                                              | Low                                                                           | Low                                                                                  | Low                                                                                 | Low                                                                             | Low                                                                                  | Low            |
| B25 | Low                                                              | Low                                                                           | Low                                                                                  | Low                                                                                 | Low                                                                             | Low                                                                                  | Low            |
| B26 | Low                                                              | Low                                                                           | Unclear                                                                              | Low                                                                                 | Low                                                                             | Low                                                                                  | Low            |
| B27 | Low                                                              | Low                                                                           | Unclear                                                                              | Low                                                                                 | Low                                                                             | Low                                                                                  | Low            |
